# Supplementary material for: Impacts of impaired face perception on social interactions and quality of life in age-related macular degeneration: A qualitative study and new community resources
Source: PubMed Central journal article supplement (PMC6312296; doi:10.1371/journal.pone.0209218), 2018-12-31
Supplement: pone.0209218.s007.pdf [file pone.0209218.s007.pdf]

Impacts of impaired face perception on social interactions and quality of life in  
age-related macular degeneration: A qualitative study and new community  
resources

Jo Lane<sup>1</sup>, Emilie M. F. Rohan<sup>2</sup>, Faran Sabeti<sup>2,7</sup>, Rohan W. Essex<sup>3</sup>, Ted Maddess<sup>2</sup>,  
Amy Dawel<sup>1</sup>, Rachel A. Robbins<sup>4</sup>, Nick Barnes<sup>5</sup>, Xuming He<sup>6</sup>, Elinor McKone<sup>1\*</sup>

*PLoS ONE 20 December 2018*

**Relative importance of face perception domain compared to  
domains currently included in the MacDQoL (Includes Tables A & B).**

In the first section of Interview 1, *before* any questions about faces had been asked (see Supplement 3), we asked patients “What areas or tasks have been made harder because of your AMD?”. This question format was deliberately open ended, and early in the interview, to obtain information about what areas/tasks came to patients' minds without prior leading questions about any particular domains. Table A lists the full set of responses from each patient, in the order they raised each area/task. Table B summarises the percentage of patients spontaneously mentioning face perception (bold responses from Table A) as compared to percentage of patients spontaneously mentioning 10 domains currently on the MacDQoL [1]. Note this table codes only for MacDQoL domains which we would reasonably be expected to be elicited by our "areas or tasks" question format: more abstract domains (e.g., 'closest personal relationships') were not mentioned by any patients but we do not take that as meaningful given the question format would not be expected to elicit these domains.

**Table A. Individual patient responses to interview question “What areas or tasks have been made harder because of your AMD?”, with face-related responses highlighted.**

| <b>Patient code</b> | <b>What areas or tasks have been made harder because of your AMD?</b>                                                                                                             |
|---------------------|-----------------------------------------------------------------------------------------------------------------------------------------------------------------------------------|
| P1                  | Reading, cutting up food, cooking, eating, dressing, hair, walking                                                                                                                |
| P2                  | Shopping, reading                                                                                                                                                                 |
| P3                  | Reading, <b>identifying people at a distance</b> , TV, walking, computer, driving, close work e.g., knitting, home duties e.g., pouring things, cooking                           |
| P4                  | Making a cup of tea, walking (especially steps/changes in height), reading, knitting, TV, going to the theatre, <b>recognising people when walking down the street</b> , shopping |
| P5                  | Everything, dressing, cooking, cutting vegetables                                                                                                                                 |
| P6                  | Everything, domestic duties, filing, crosswords                                                                                                                                   |
| P7                  | Reading, <b>recognising someone across the room</b> , telephone numbers, gardening, sewing                                                                                        |
| P8                  | Walking around, reading, cooking, cleaning, driving                                                                                                                               |
| P9                  | Reading, quilting, beading                                                                                                                                                        |
| P10                 | Driving, <b>recognising people in a crowd at a distance</b> , reading                                                                                                             |
| P11                 | Writing, computer, <b>identifying people</b> , driving                                                                                                                            |
| P12                 | Reading, <b>watching TV because can't see people very clearly</b> , sewing                                                                                                        |
| P13                 | Reading, computer, gardening, sewing, <b>recognising people</b>                                                                                                                   |
| P14                 | Work (practicing pharmacy), driving, reading, working with tools e.g., machinery                                                                                                  |
| P15                 | Reading, needle work, close work, seeing the ballet                                                                                                                               |
| P16                 | Getting around/walking, reading, shopping, driving                                                                                                                                |
| P17                 | Reading, cooking, craft, knitting, playing DVDs, ironing, driving, TV                                                                                                             |
| P18                 | Reading, close work e.g., sewing, cooking, cutting, gardening, home duties e.g., ironing, cleaning, things with electricity, driving, crossing streets                            |
| P19                 | Reading, writing, knitting, using my hands                                                                                                                                        |
| P20                 | <b>Recognising people</b> , looking at fine things e.g., microwave, odd jobs at home, reading, driving                                                                            |
| P21                 | Painting, reading a clock, seeing colour, knitting, crocheting, tasks around home e.g., dealing with electricity/powerpoints                                                      |

**Table B. Percentage of patients spontaneously mentioning face perception as compared to 10 domains currently on the MacDQoL [1].**

| <b>Domain (all except faces currently included in MacDQoL)</b> | <b>No of patients</b> | <b>% of patients (N=21)</b> |
|----------------------------------------------------------------|-----------------------|-----------------------------|
| Interests/Free time activities (reading, TV, radio, hobbies)   | 20                    | 95                          |
| Household tasks                                                | 16                    | 76                          |
| Get out and about (foot, car, bus, train)                      | 11                    | 52                          |
| <b>Faces</b>                                                   | <b>8</b>              | <b>38</b>                   |
| Personal affairs (letters, bills, etc.)                        | 3                     | 14                          |
| Shopping                                                       | 3                     | 14                          |
| Physical appearance (clothes, grooming)                        | 2                     | 10                          |
| Enjoy meals                                                    | 1                     | 5                           |
| Independence                                                   | 0                     | 0                           |
| Do things for others                                           | 0                     | 0                           |
| Mishaps or lose things                                         | 0                     | 0                           |

*Notes:*

Some domains in the MacDQoL [1] provide specific examples e.g., Interests/Free time activities (reading, TV, radio, hobbies), whereas other domains e.g., household tasks, does not provide examples. We categorised patients' responses in Table A into the most suitable MacDQoL domain e.g., for household tasks included cooking, gardening and use of powerpoints.

## **References for S7 File.**

1. Mitchell J, Bradley C. Design of an individualised measure of the impact of macular disease on quality of life (the MacDQoL). *Qual Life Res.* 2004;13: 1163-1175.
